# Supplementary material for: Transcriptome Analysis Reveals Candidate Genes Involved in Gibberellin-Induced Fruit Setting in Triploid Loquat (Eriobotrya japonica)
Source: PubMed Central journal article supplement (PMC5174095; doi:10.3389/fpls.2016.01924), 2016-12-21

Top 20 Statistics of Pathway Enrichment for CK3-vs-T3

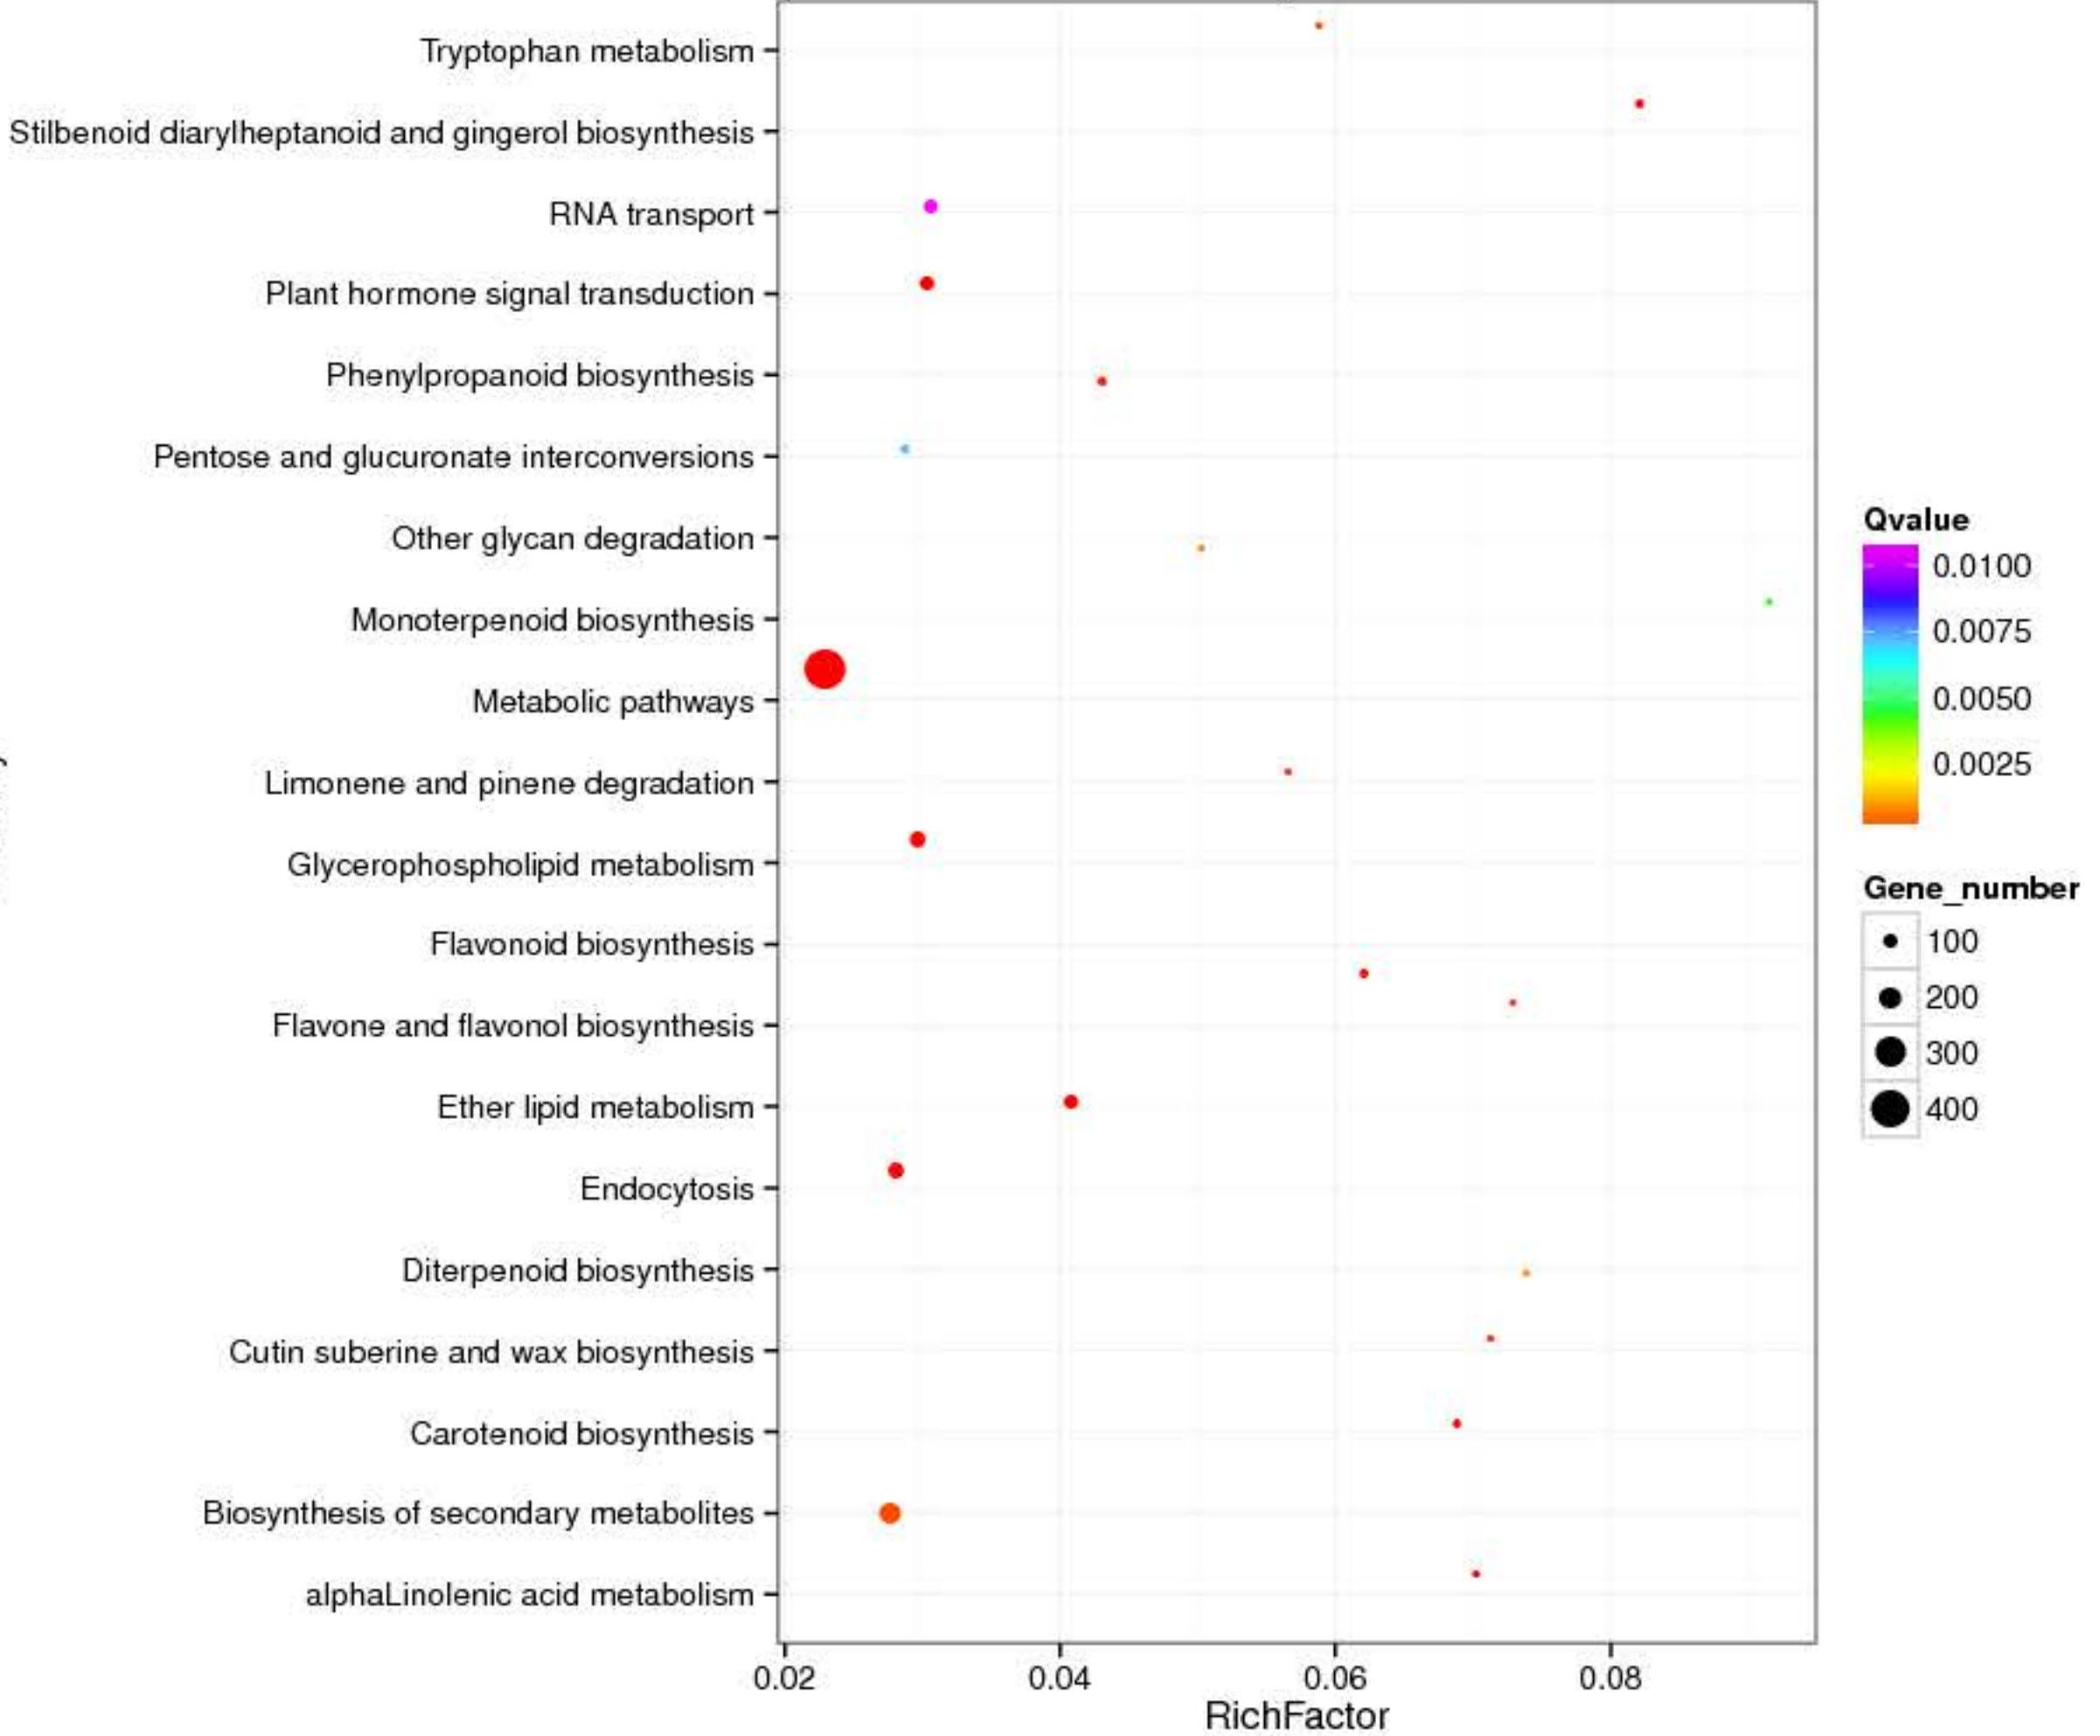

Top 20 Statistics of Pathway Enrichment for CK7-vs-T7

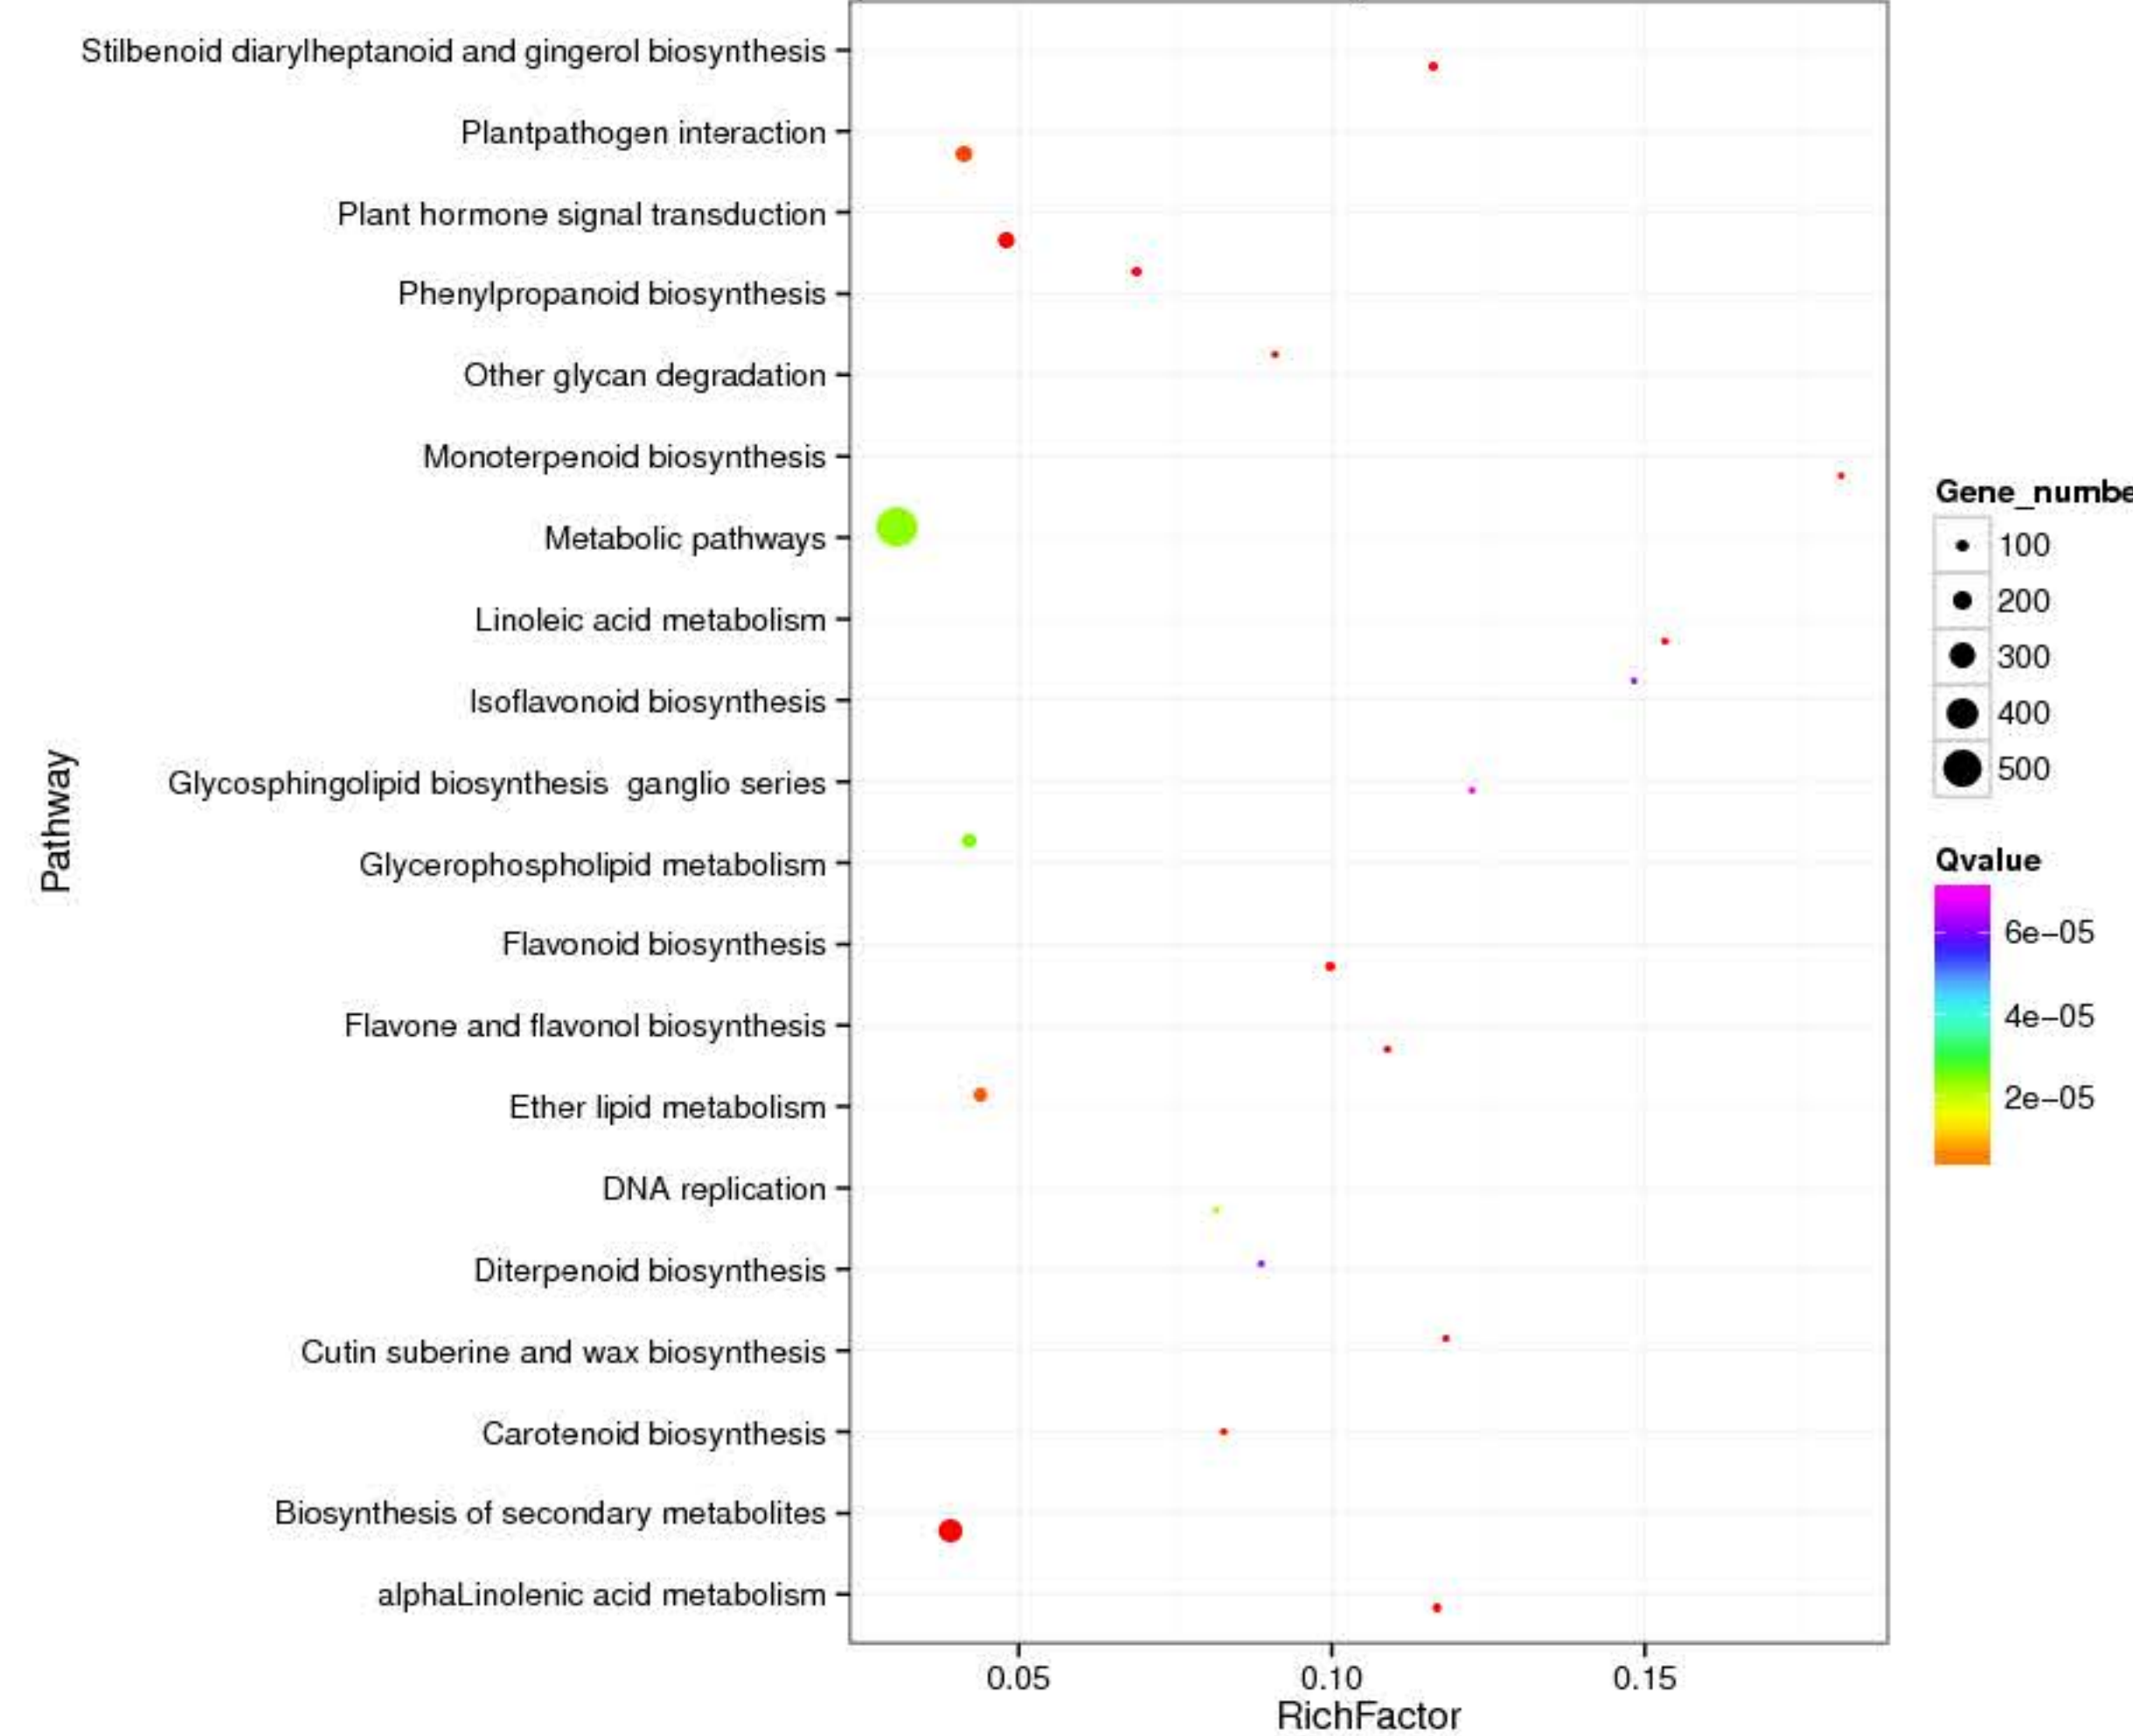

Top 20 Statistics of Pathway Enrichment for CK14-vs-T14

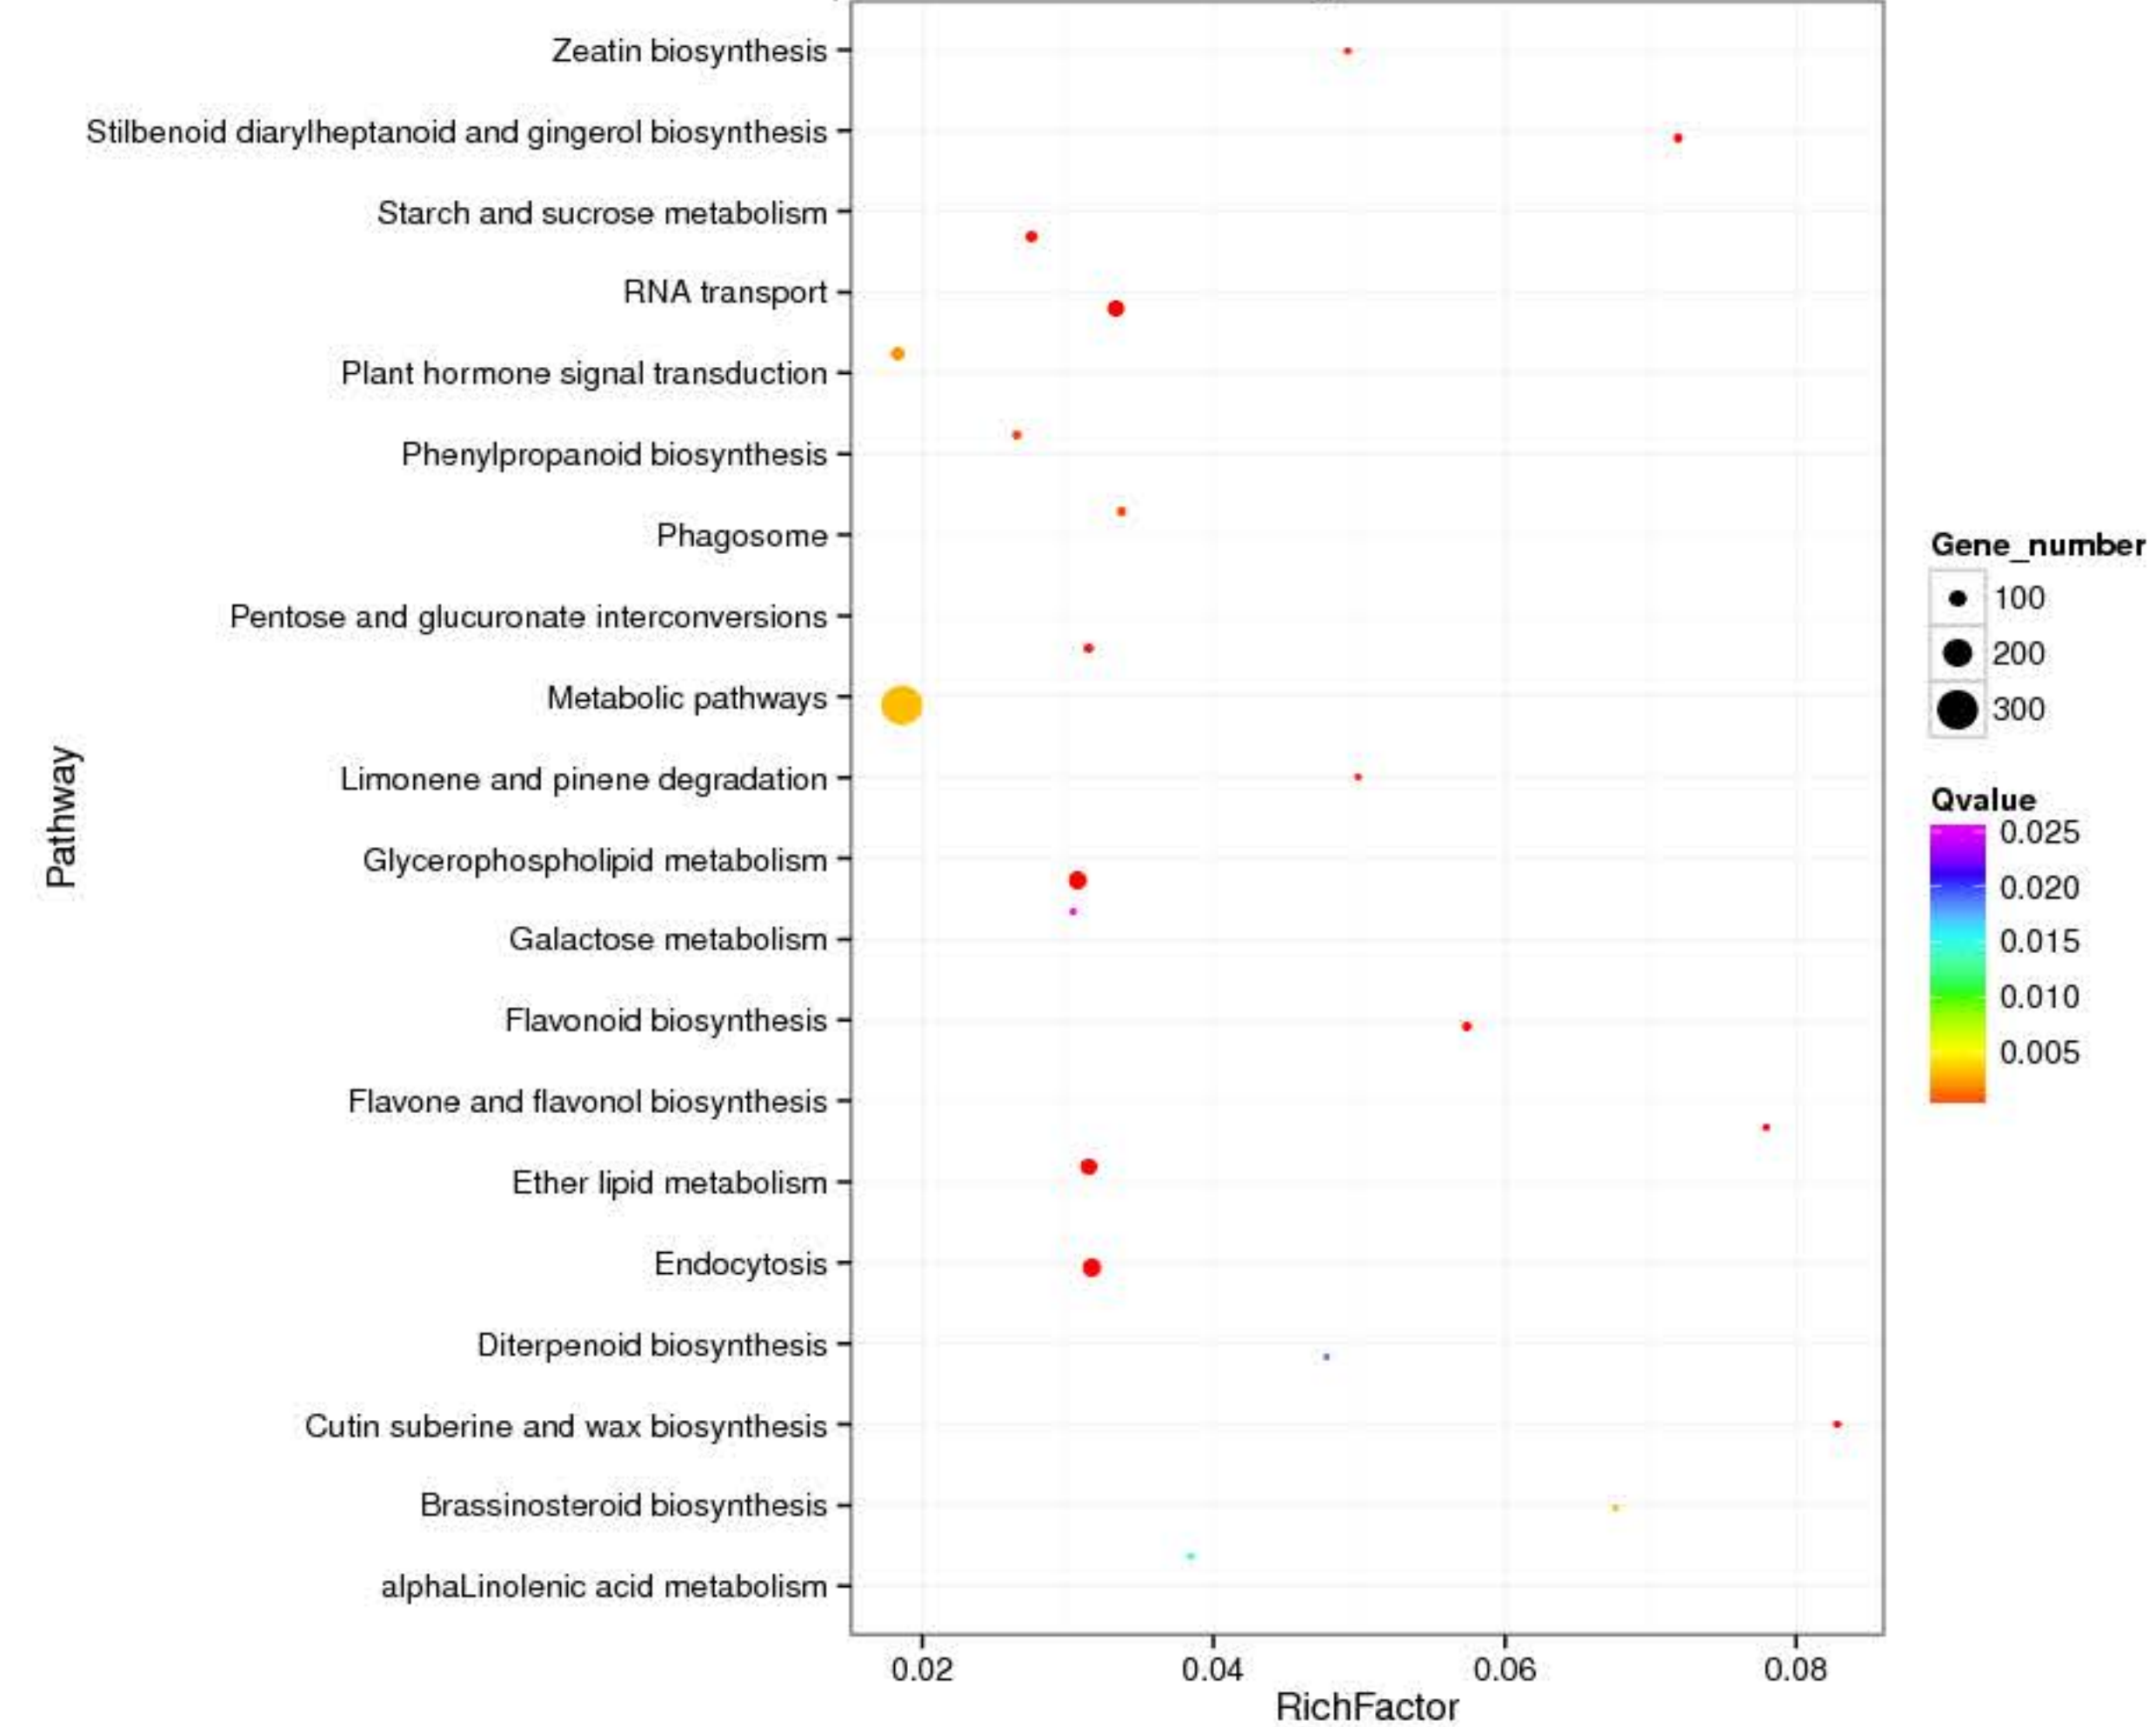

Supplement: Image_3.pdf [file Image_3.pdf]
